# Supplementary material
Source: Elsevier journal article supplement (https://www.sciencedirect.com/science/article/pii/S1885585726000319)
Supplement: mmc1 [file mmc1.pdf]

## Supplementary Data

**Figure S1.** Box plots of baseline CT-ADP across the three study groups: mitral paravalvular leak (Group 1), prosthetic mitral valves without PVL (Group 2), and controls without prosthetic valves or valvular disease (Group 3).

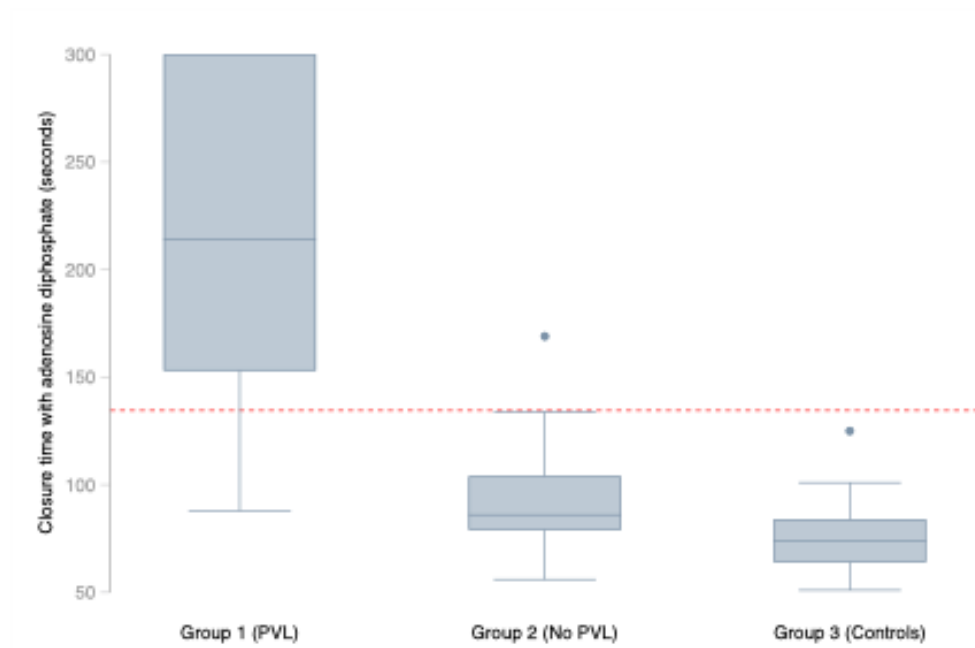

**Figure S2.** (A) ROC curve showing the diagnostic performance of biomarkers for detecting paravalvular leak. (B) ROC curve showing the diagnostic performance of biomarkers for detecting residual paravalvular leak after repair.

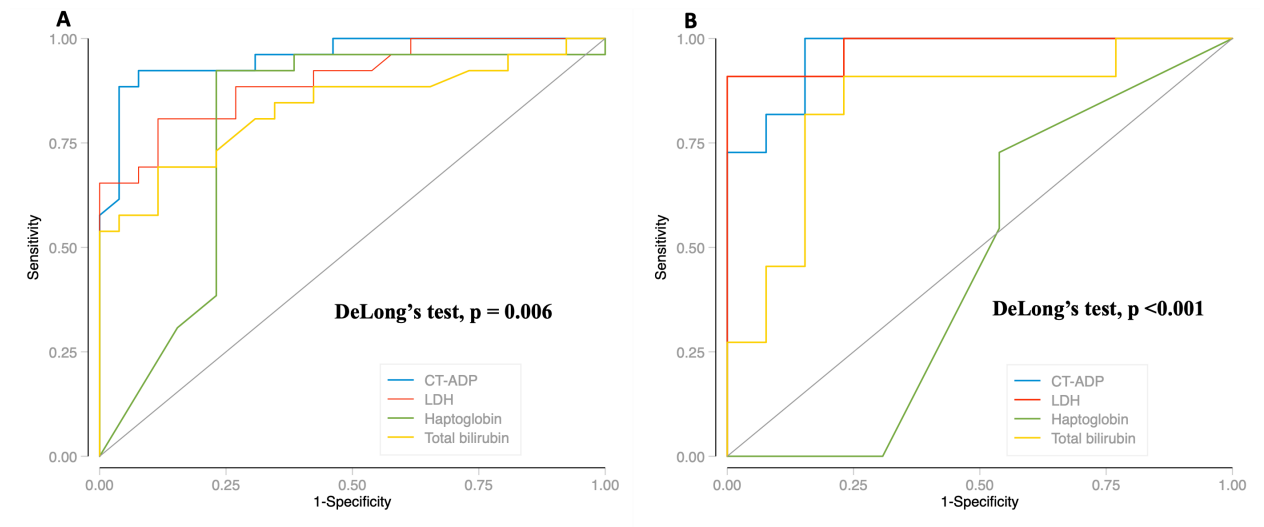

**Table S1.** Univariate regression analysis of clinical and biochemical predictors of CT-ADP across patient cohorts: Group 1 (Severe PVL), Group 2 (Prosthesis without PVL), and Group 3 (Healthy Controls).

| <b>Predictor</b>         | <b>Group 1</b>     |                | <b>Group 2</b>     |                | <b>Group 3</b>     |                |
|--------------------------|--------------------|----------------|--------------------|----------------|--------------------|----------------|
|                          | <b>Coefficient</b> | <b>p-value</b> | <b>Coefficient</b> | <b>p-value</b> | <b>Coefficient</b> | <b>p-value</b> |
| <b>Age</b>               | 0.001              | 1.0            | -0.54              | 0.132          | -0.203             | 0.625          |
| <b>Female</b>            | 16.017             | 0.572          | -17.413            | 0.032          | -8.676             | 0.158          |
| <b>Diabetes Mellitus</b> | -30.7              | 0.389          | -13.4              | 0.24           | 4.93               | 0.403          |
| <b>Hypertension</b>      | 7.55               | 0.822          | -4.93              | 0.559          | 5.82               | 0.462          |
| <b>CKD (GFR &lt; 60)</b> | -8.19              | 0.773          | -10.8              | 0.283          | -4.87              | 0.448          |
| <b>Aortic prosthesis</b> | -49.5              | 0.178          | 0.5                | 0.965          |                    |                |
| <b>Aortic gradient</b>   | 0.716              | 0.527          | 0.633              | 0.448          | 1.3                | 0.319          |
| <b>LDH</b>               | 0.04               | 0.073          | -0.024             | 0.7            | 0.075              | 0.206          |
| <b>Total bilirubin</b>   | 23.5               | 0.128          | 12.5               | 0.513          | -3.96              | 0.702          |
| <b>Direct bilirubin</b>  | 69.3               | 0.057          | 62.5               | 0.192          | 11.8               | 0.584          |
| <b>Haptoglobin</b>       | 36.0               | 0.171          | 13.8               | 0.012          | 2.49               | 0.423          |
| <b>NT-proBNP</b>         | 0.009              | 0.082          | -0.004             | 0.217          | 0.001              | 0.669          |
| <b>CA-125</b>            | -0.068             | 0.775          | -0.394             | 0.065          | 0.214              | 0.386          |
| <b>Hemoglobin</b>        | 11.8               | 0.064          | -3.39              | 0.09           | 1.32               | 0.399          |
| <b>Platelets</b>         | -0.412             | 0.063          | -0.081             | 0.084          | -0.038             | 0.165          |

CA-125: Cancer Antigen 125; CKD: Chronic Kidney Disease GFR: Glomerular Filtration Rate; LDH: Lactate Dehydrogenase; NT-proBNP: N-terminal pro-B-type Natriuretic Peptide.

**Table S2.** Linear regression analysis of echocardiographic and hemodynamic predictors of pre-procedural CT-ADP in patients with mitral paravalvular leak.

| <b>Predictor</b>                 | <b>Coefficient</b> | <b>95% CI</b>   | <b>p-value</b> | <b>Adj. R<sup>2</sup></b> |
|----------------------------------|--------------------|-----------------|----------------|---------------------------|
| <b>Multiple leaks</b>            | 33.46              | -21.84 – 88.75  | 0.224          | 0.02                      |
| <b>Number of leaks (2 vs. 1)</b> | 27.18              | -35.26 – 89.62  | 0.378          | -0.01                     |
| <b>Indexed LA volume</b>         | 0.14               | -0.566 – 0.839  | 0.400          | -0.04                     |
| <b>Pulmonary artery pressure</b> | -0.57              | -3.01 – 1.87    | 0.629          | -0.03                     |
| <b>LA pressure</b>               | 3.86               | -0.005 – 7.73   | 0.050          | 0.14                      |
| <b>LA V-wave peak pressure</b>   | 2.66               | 0.86 – 4.46     | 0.006          | 0.29                      |
| <b>Ratio V-wave/SBP</b>          | 379.87             | 139.06 – 620.67 | 0.004          | 0.32                      |
| <b>Mechanical prosthesis</b>     | 12.82              | -44.25 – 69.88  | 0.648          | -0.031                    |

CI: confidence interval; LA: left atrial; SBP: systolic blood pressure; SE: standard error.
